# Supplementary material
Source: publisher figshare collection journal article supplement (https://acs.figshare.com/ndownloader/files/9183325)
Supplement: Supplementary file 1 [file 9183325]

# **Tuning Phase Composition of Polymer Nanocomposites towards High Energy Density and High Discharge Efficiency by Non-Equilibrium Processing**

Jianyong Jiang,<sup>†</sup> Xin Zhang,<sup>†</sup> Zhenkang Dan,<sup>†</sup> Jing Ma,<sup>†</sup> Yuanhua Lin,<sup>†</sup> Ming Li,<sup>†</sup> Ce-Wen Nan,<sup>†,\*</sup>  
and Yang Shen<sup>†,\*</sup>

<sup>†</sup> State Key Lab of New Ceramics and Fine Processing, School of Materials Science and Engineering, Tsinghua University, Beijing, 100084, China

\*Corresponding authors. E-mail: shyang\_msc@tsinghua.edu.cn

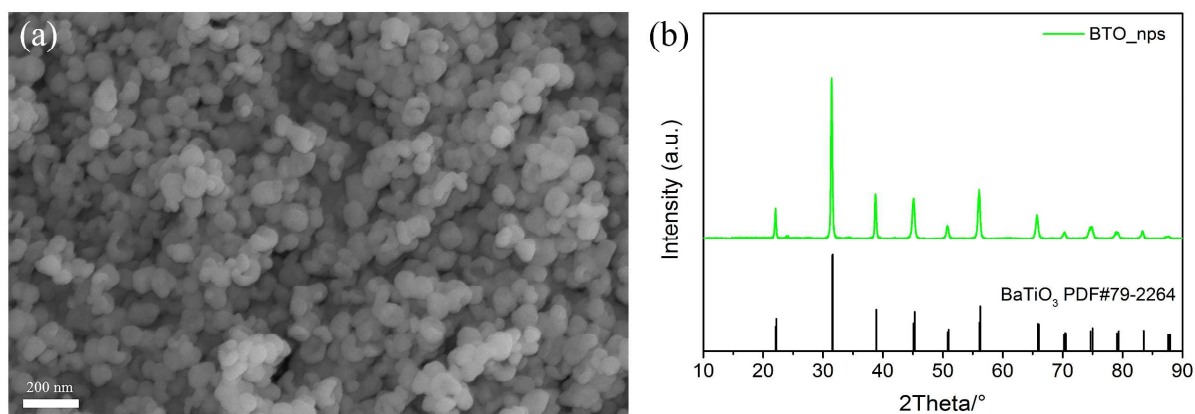

**Figure S1.** (a) The SEM image of BTO\_nps. The size of BTO\_nps is about 50 nm. (b) the corresponding XRD pattern of BTO\_nps.

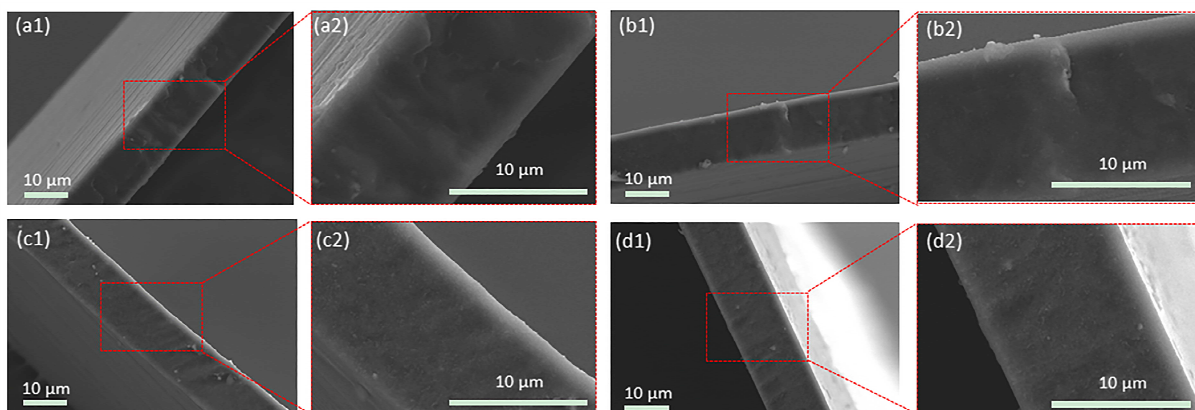

**Figure S2.** SEM images (a1, b1, c1, d1) and magnifying SEM images (a2, b2, c2, d2) of cross sections of BTO\_nps/P(VDF-HFP) nanocomposite films by non-equilibrium process with different BTO\_nps volume fractions: 0 vol.% (a), 1 vol.% (b), 5 vol.% (c), 10 vol.% (d).

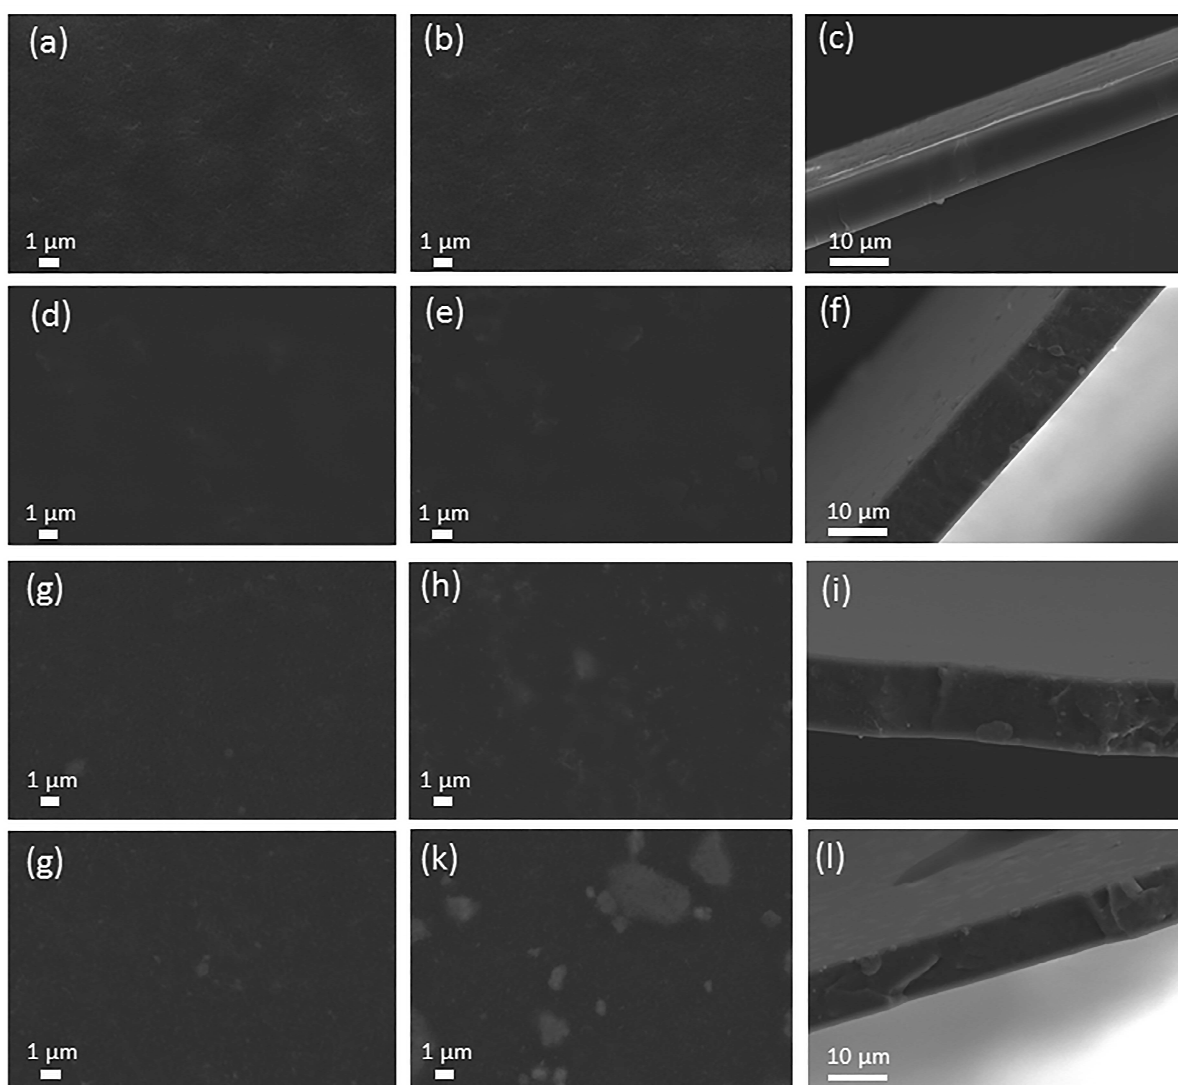

**Figure S3.** SEM images of top surfaces(a,d,g,j), bottom surfaces (b,e,h,k) and cross sections (c,f,i,l) of BTO\_nps/P(VDF-HFP) nanocomposite films by equilibrium process with different BTO\_nps volume fractions: 0

vol.% (a,b,c), 1 vol.% (d,e,f), 5 vol.% (g,h,i), 10 vol.% (j,k,l).

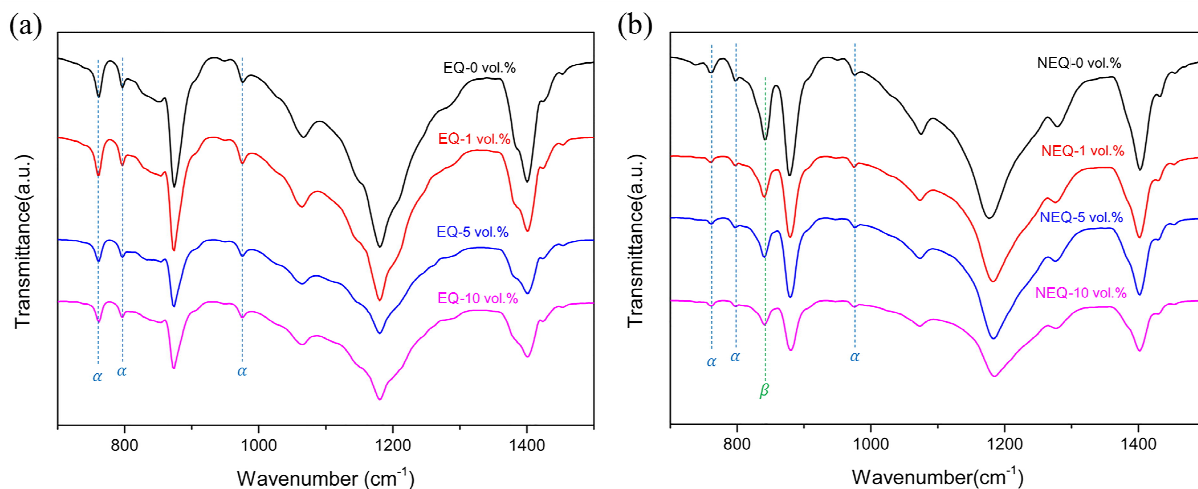

**Figure S4.** FTIR patterns of equilibrium (a) and non-equilibrium (b) nanocomposite films, respectively.

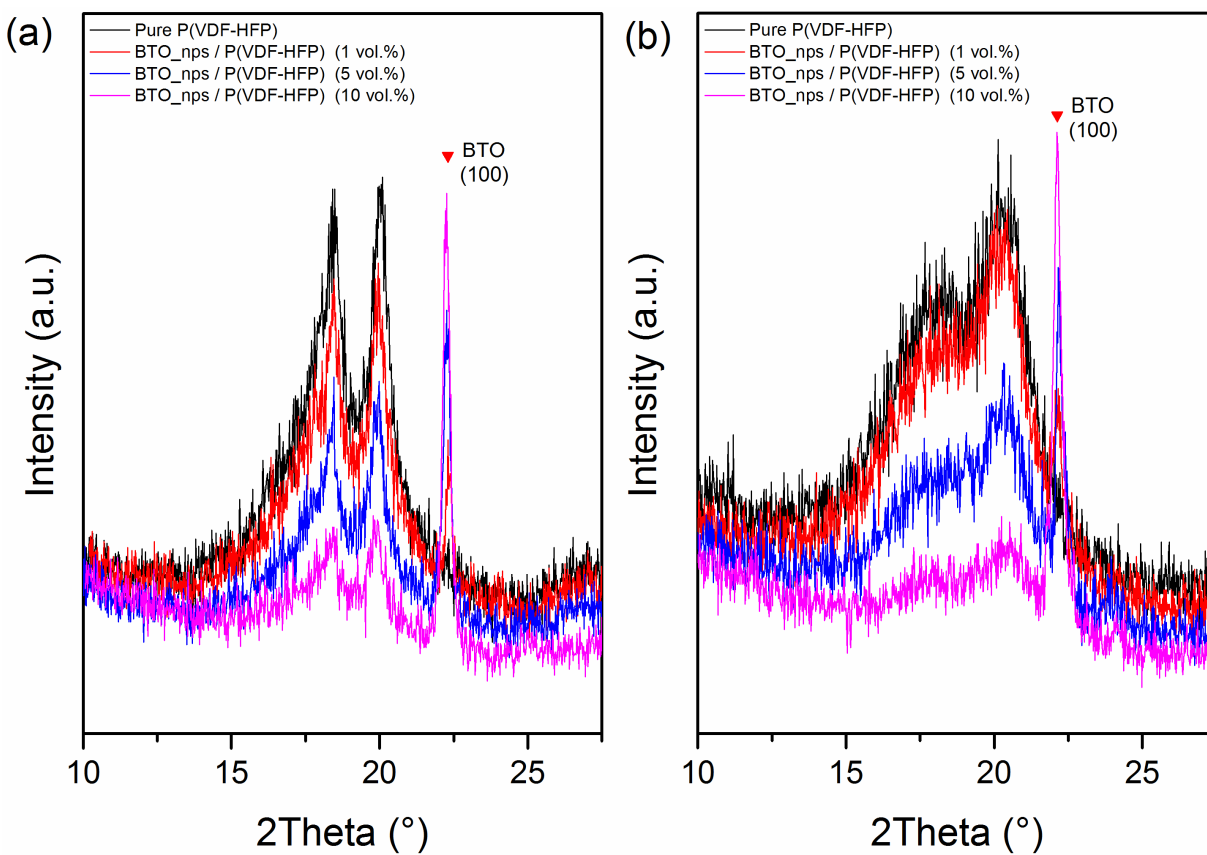

**Figure S5.** WAXD patterns of pure P(VDF-HFP) films and BTO<sub>nps</sub>/P(VDF-HFP) nanocomposite films fabricated with equilibrium (a) and non-equilibrium (b) processes, respectively.

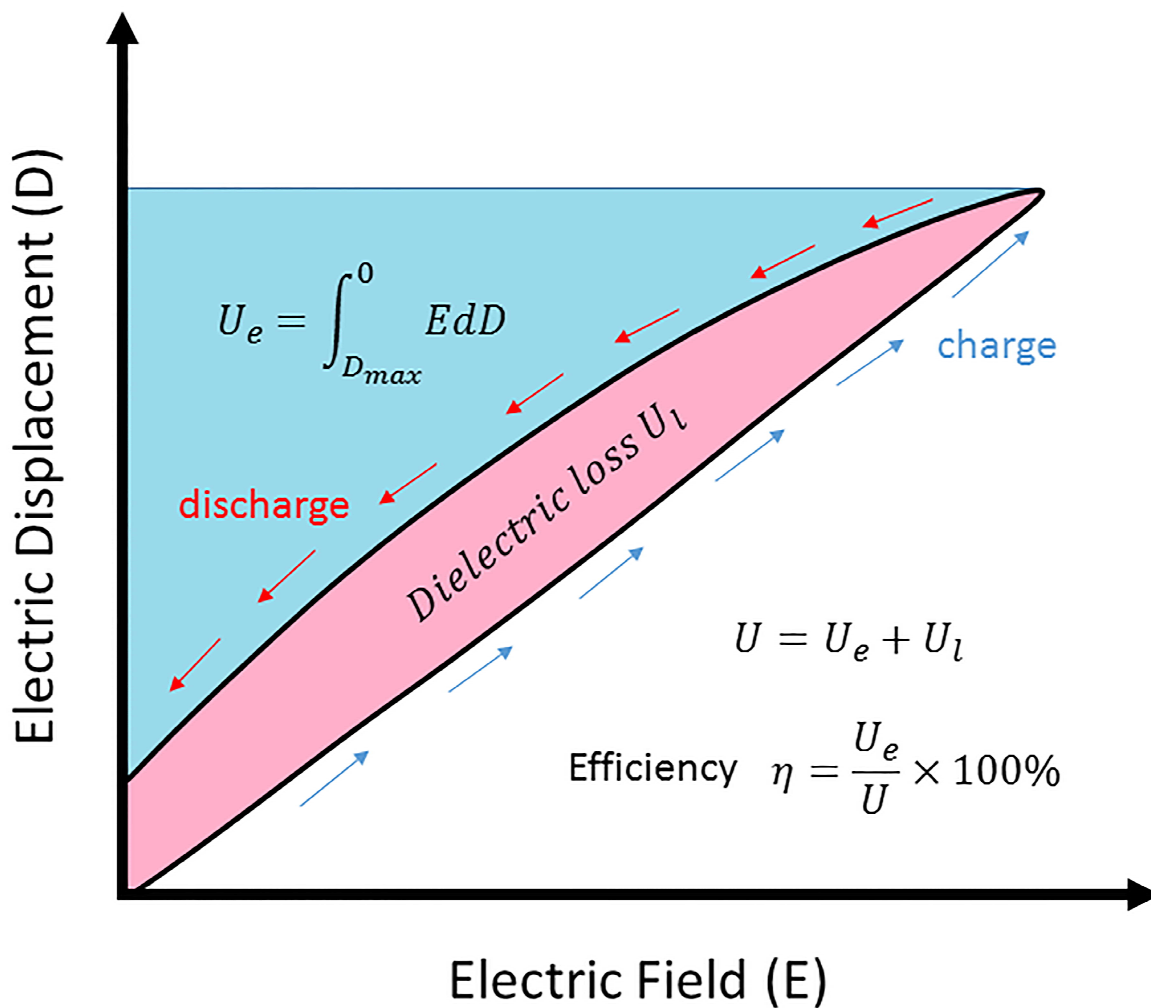

**Figures S6.** Schematic D-E loop for a dielectric material. The discharged energy density ( $U_e$ ) is represented by the cyan area between the discharge curve and the electric displacement axis, while the energy dissipated ( $U_l$ ) is indicated by the pink area surrounded by the loop curve. Apparently, the totally charged energy density ( $U$ ) equals to  $U_e$  plus  $U_l$ . The charge-discharge efficiency is defined as  $U_e/U \times 100\%$ .



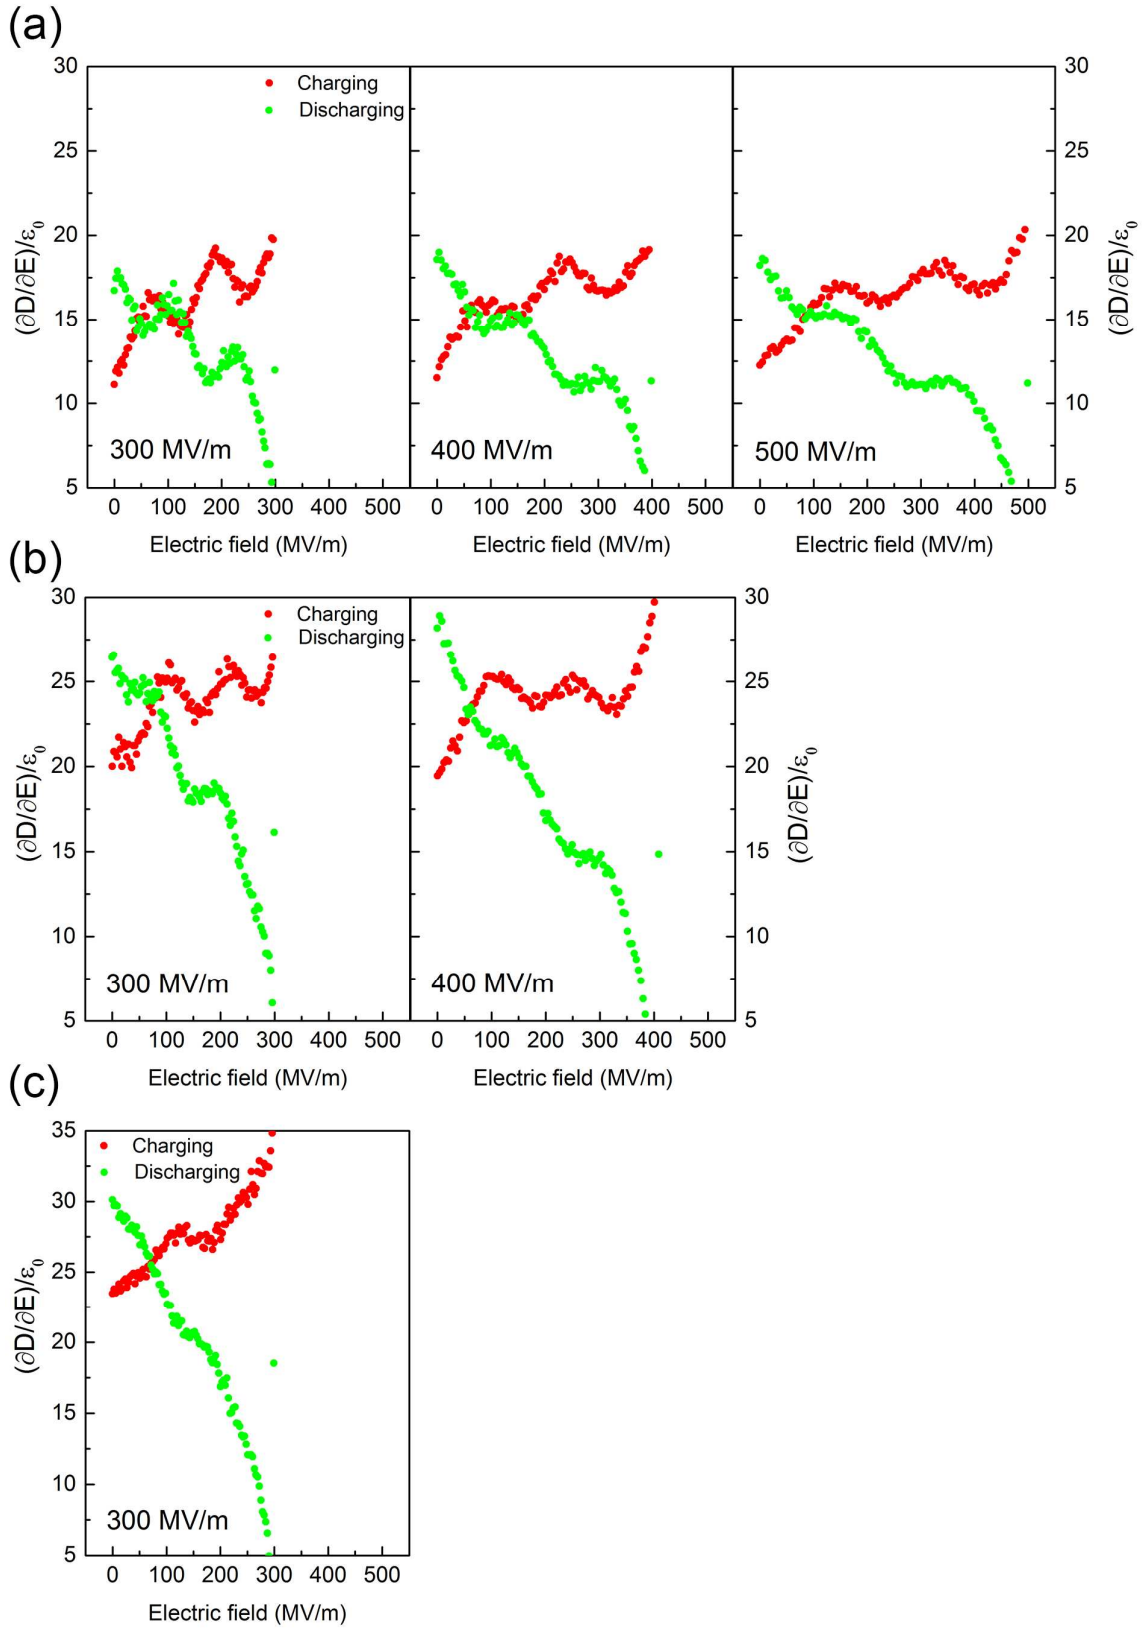

**Figure S7.** Derivative curves of  $D$ ,  $(\partial D/\partial E)/\epsilon_0$ , as a function of electric field under different poling electric field (300-500 MV/m) for equilibrium nanocomposite films with 1 vol.% (a), 5 vol.% (b) and 10 vol.% (c) BTO<sub>nps</sub> loading, respectively.

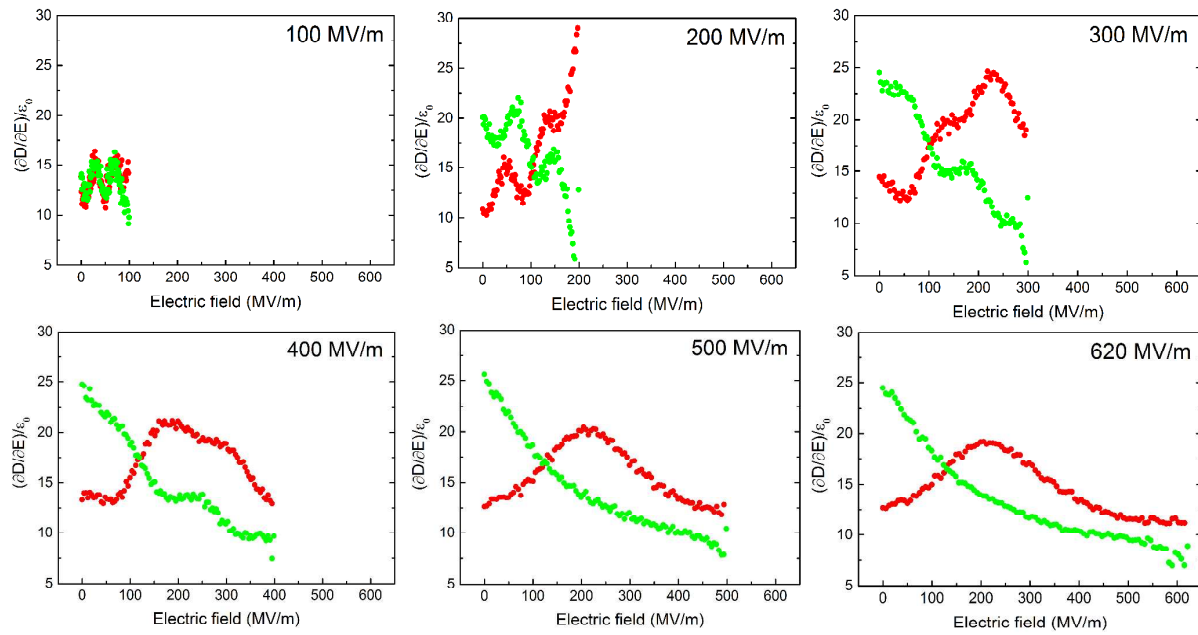

**Figure S8.** Derivative curves of  $D$ ,  $(\partial D/\partial E)/\epsilon_0$ , as a function of electric field under different poling electric field for pure non-equilibrium P(VDF-HFP) films.

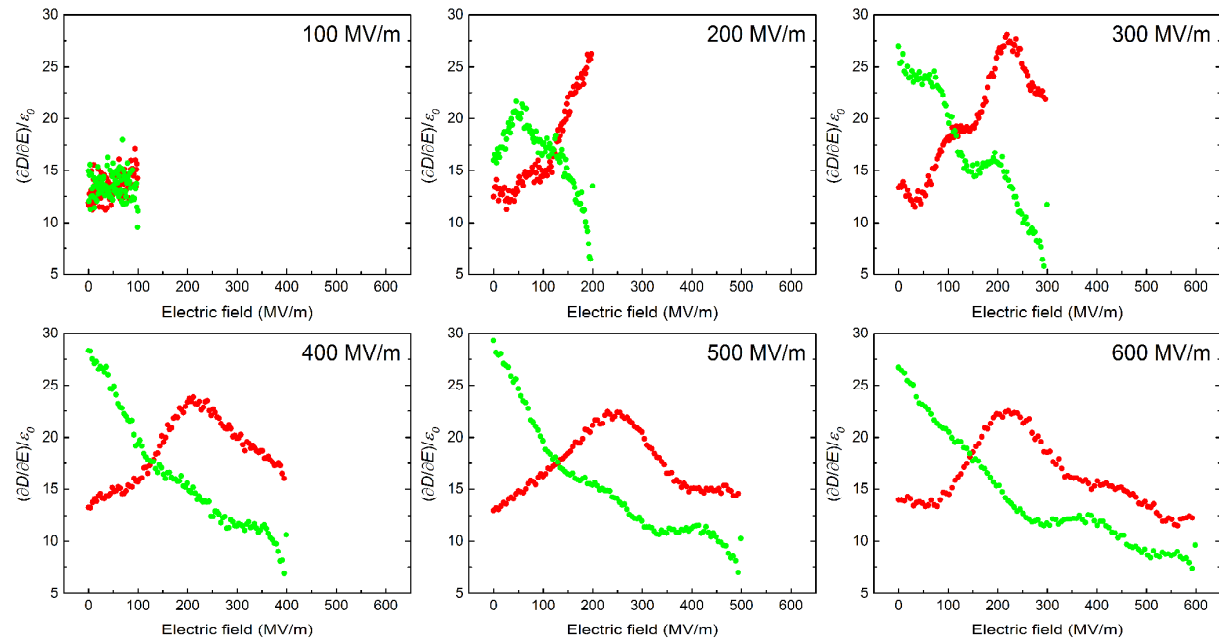

**Figure S9.** Derivative curves of  $D$ ,  $(\partial D/\partial E)/\epsilon_0$ , as a function of electric field under different poling electric field for non-equilibrium nanocomposite films with 1 vol.% BTO<sub>nps</sub> loading.

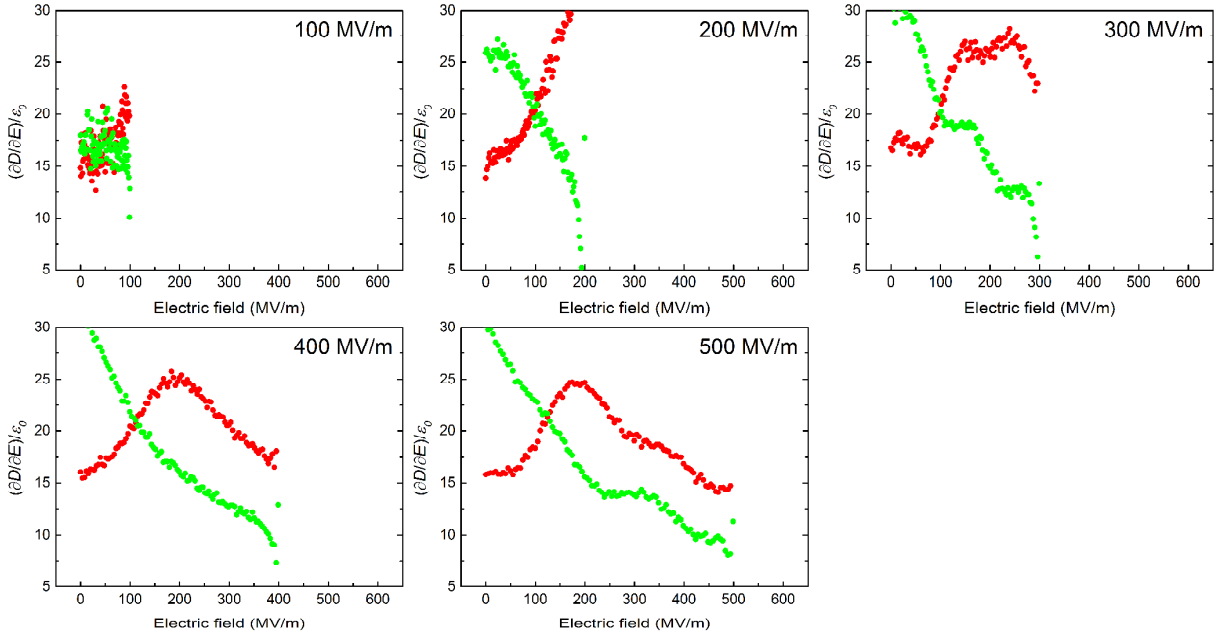

**Figure S10.** Derivative curves of  $D$ ,  $(\partial D / \partial E) / \epsilon_0$ , as a function of electric field under different poling electric field for non-equilibrium nanocomposite films with 5vol.% BTO\_nps loading.

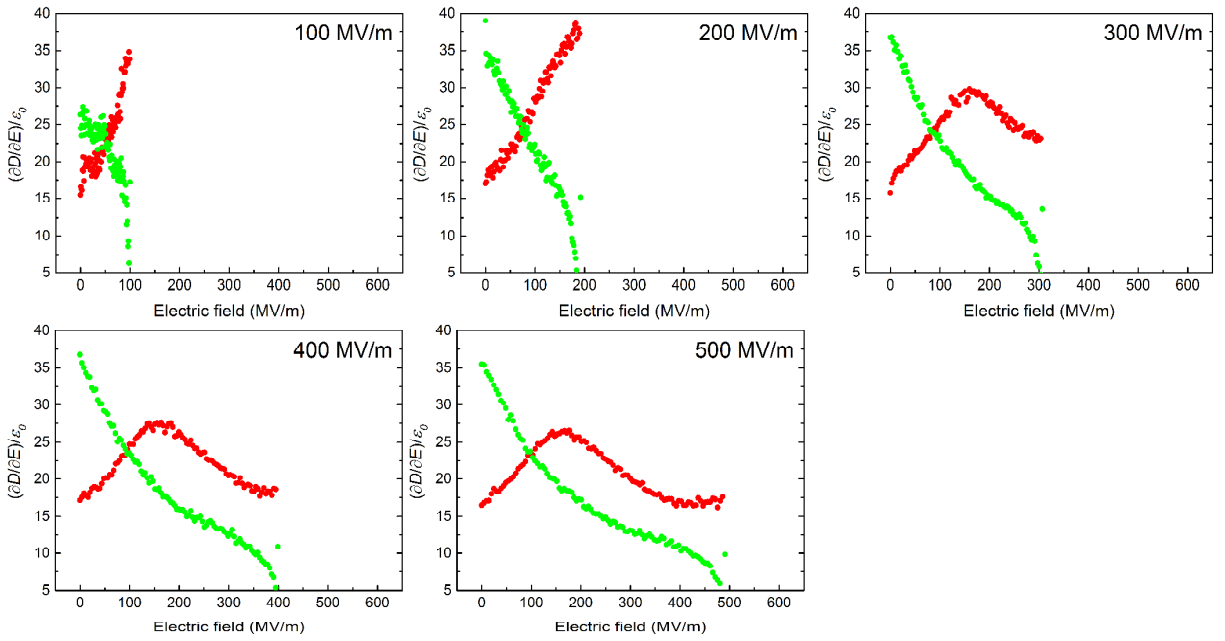

**Figure S11.** Derivative curves of  $D$ ,  $(\partial D / \partial E) / \epsilon_0$ , as a function of electric field under different poling electric field for non-equilibrium nanocomposite films with 10vol.% BTO\_nps loading.

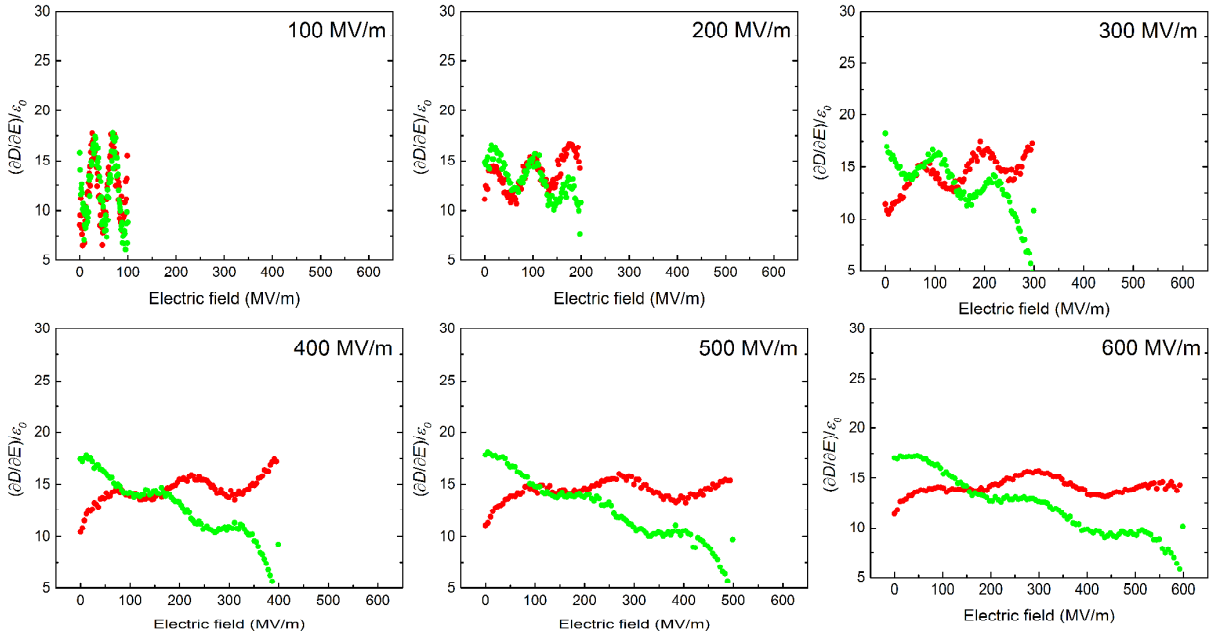

**Figure S12.** Derivative curves of  $D$ ,  $(\partial D/\partial E)/\epsilon_0$ , as a function of electric field under different poling electric field for pure equilibrium P(VDF-HFP) films.

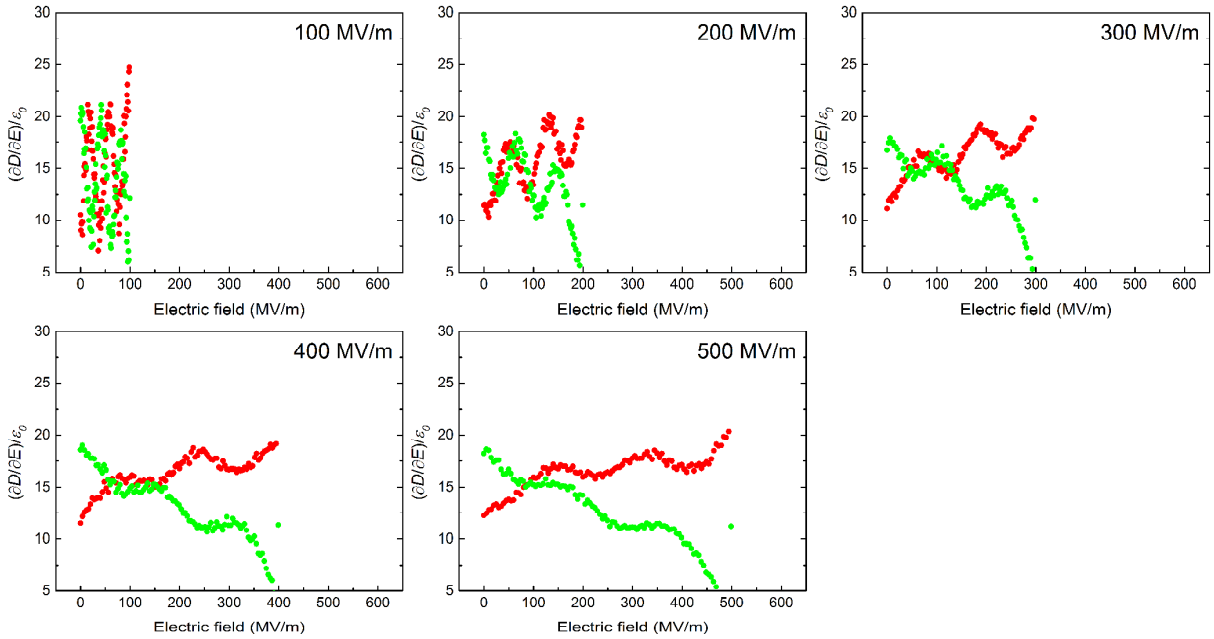

**Figure S13.** Derivative curves of  $D$ ,  $(\partial D/\partial E)/\epsilon_0$ , as a function of electric field under different poling electric field for equilibrium nanocomposite films with 1vol.% BTO<sub>nps</sub> loading.

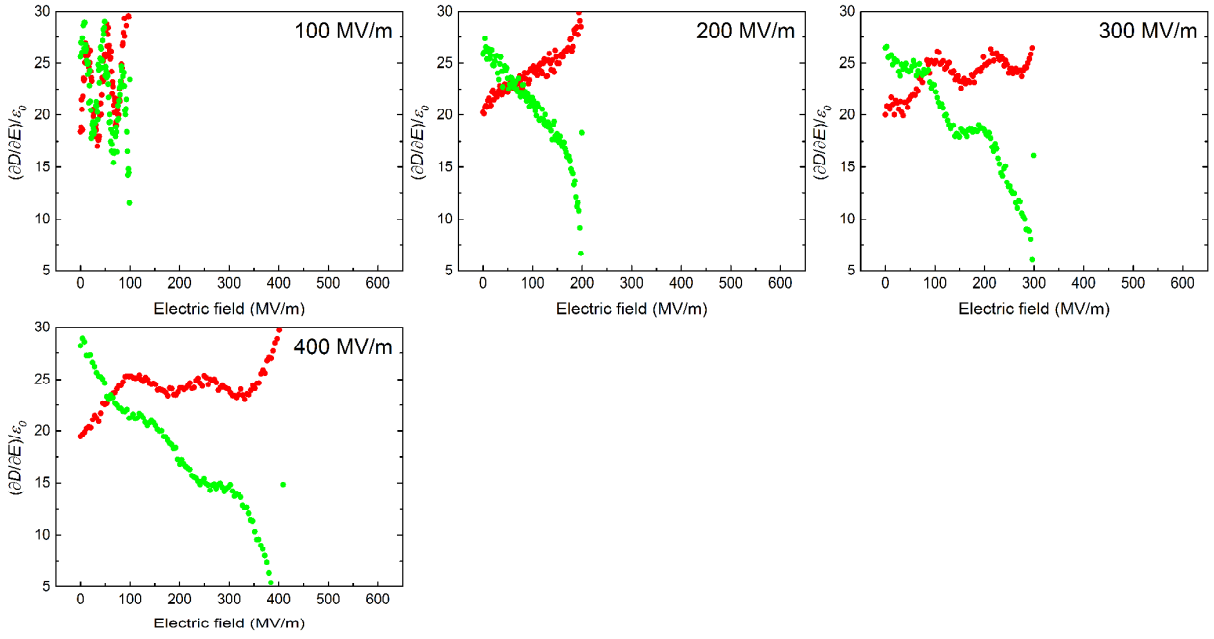

**Figure S14.** Derivative curves of  $D$ ,  $(\partial D/\partial E)/\epsilon_0$ , as a function of electric field under different poling electric field for equilibrium nanocomposite films with 5vol.% BTO\_nps loading.

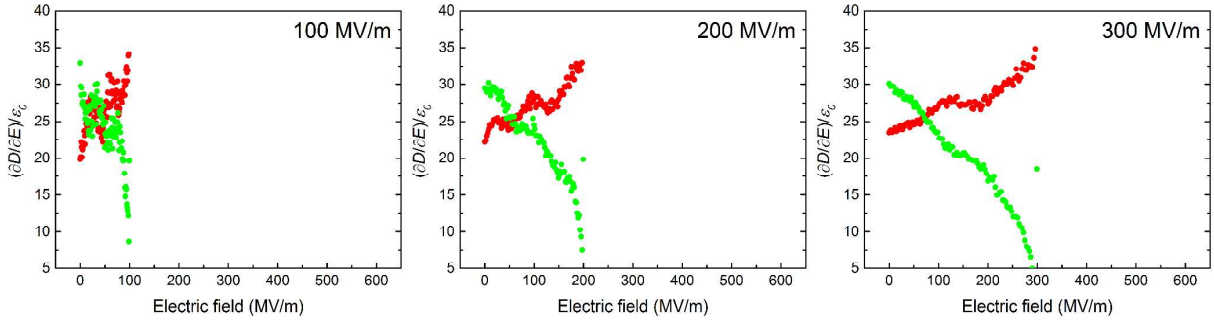

**Figure S15.** Derivative curves of  $D$ ,  $(\partial D/\partial E)/\epsilon_0$ , as a function of electric field under different poling electric field for equilibrium nanocomposite films with 10vol.% BTO\_nps loading.
